# Supplementary material
Source: Springer Nature journal article supplement (https://www.springermedizin.de/resource/supplementary/12950_2009_165_MOESM1_ESM.pdf/9558106)

0h

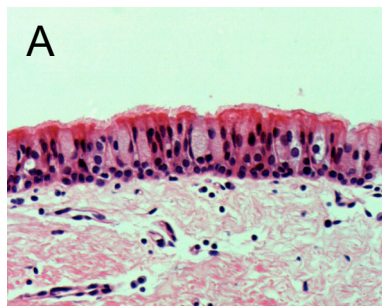

5h

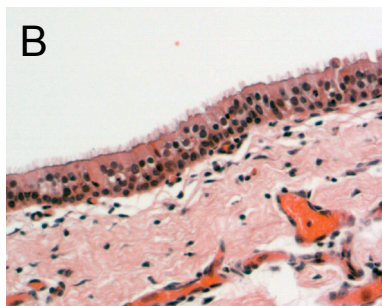

24h

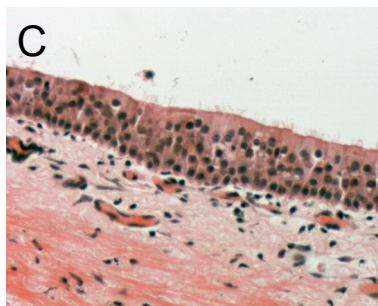

48h

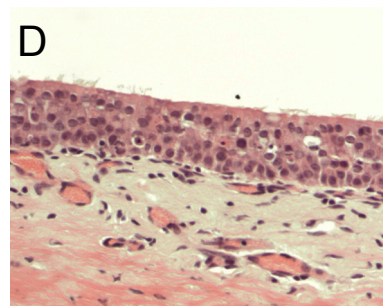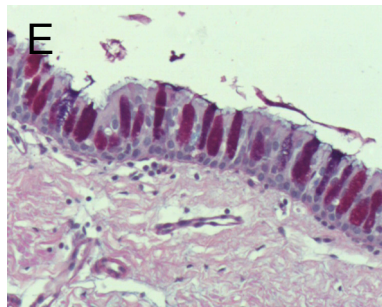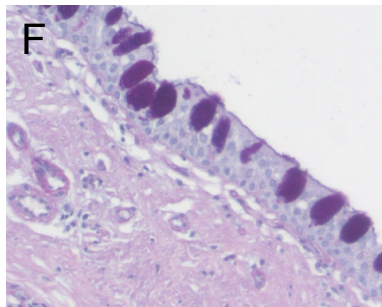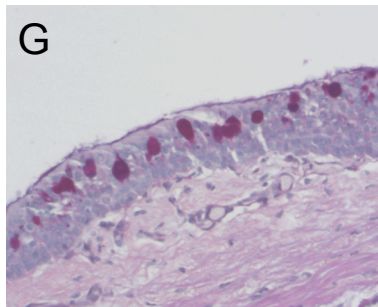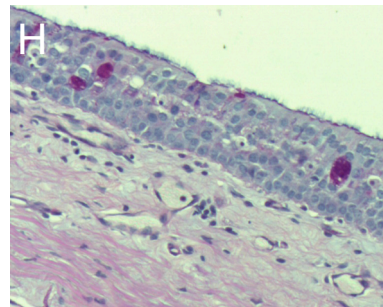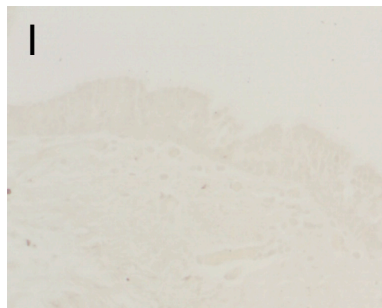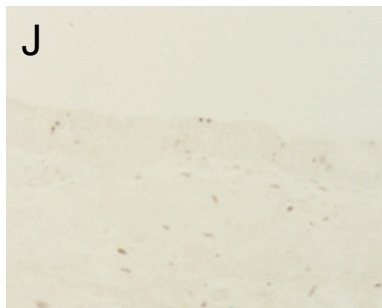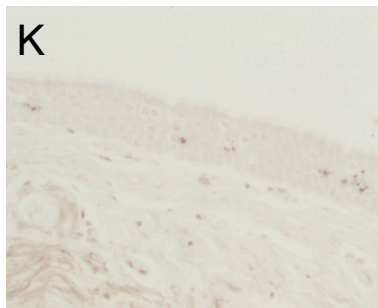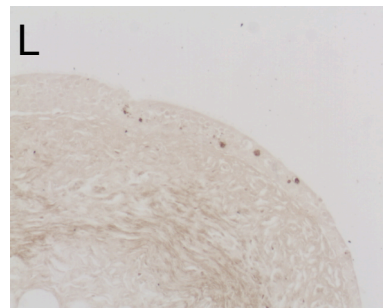

Supplement: MOESM1 [file 9558106]
